# Supplementary material for: Unusual properties of nanostructured Ce1−xCoxO2−y, Ce1−xNixO2−y and Ce1−(x+y)CoxNiyO2−z: structural studies and catalytic activity
Source: Royal Society of Chemistry journal article supplement (doi:10.1039/c2ce26651b), 2012-11-28

## Electronic Supplementary Information

### Unusual properties of nanostructured $\text{Ce}_{1-x}\text{Co}_x\text{O}_{2-y}$ , $\text{Ce}_{1-x}\text{Ni}_x\text{O}_{2-y}$ and $\text{Ce}_{1-(x+y)}\text{Co}_x\text{Ni}_y\text{O}_{2-z}$ : Structural studies and catalytic activity

Simou Sun, Xiulan Zhao, Hang Lu, Zhida Zhang, Jingjing Wei, Yanzhao Yang\*

Key Laboratory for Special Functional Aggregate Materials of Education  
Ministry, School of Chemistry and Chemical Engineering, Shandong  
University, Jinan 250100, P. R. China.

\*Corresponding author, E-mail: [yzhyang@sdu.edu.cn](mailto:yzhyang@sdu.edu.cn)

Fig.SI1. Survey XPS spectra of  $\text{Ce}_{0.92}\text{Co}_{0.06}\text{Ni}_{0.02}\text{O}_{2-z}$ :

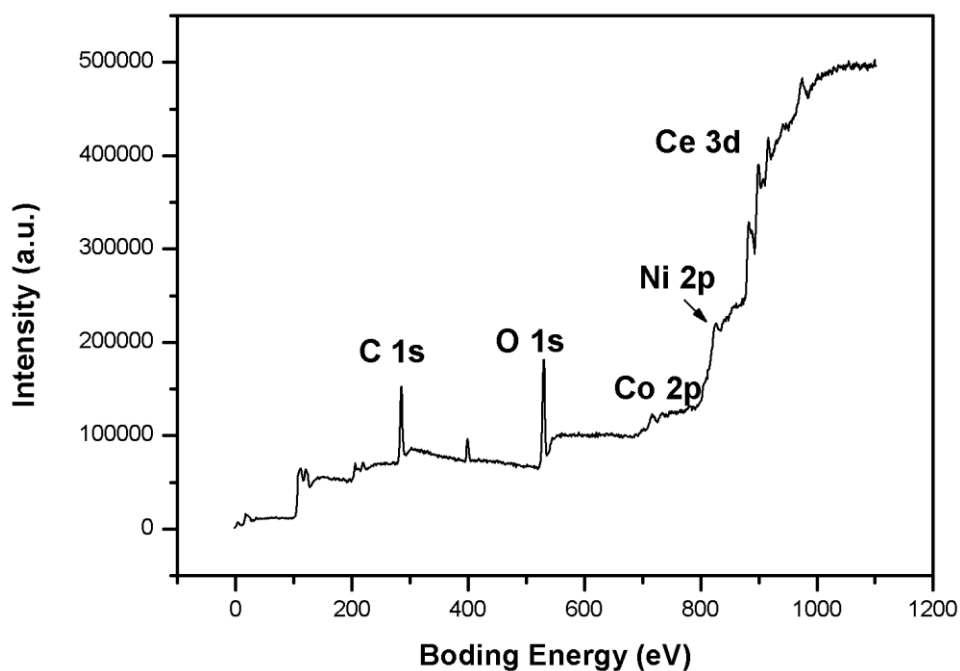

Fig. SI2. The TEM photo of production without PVP:

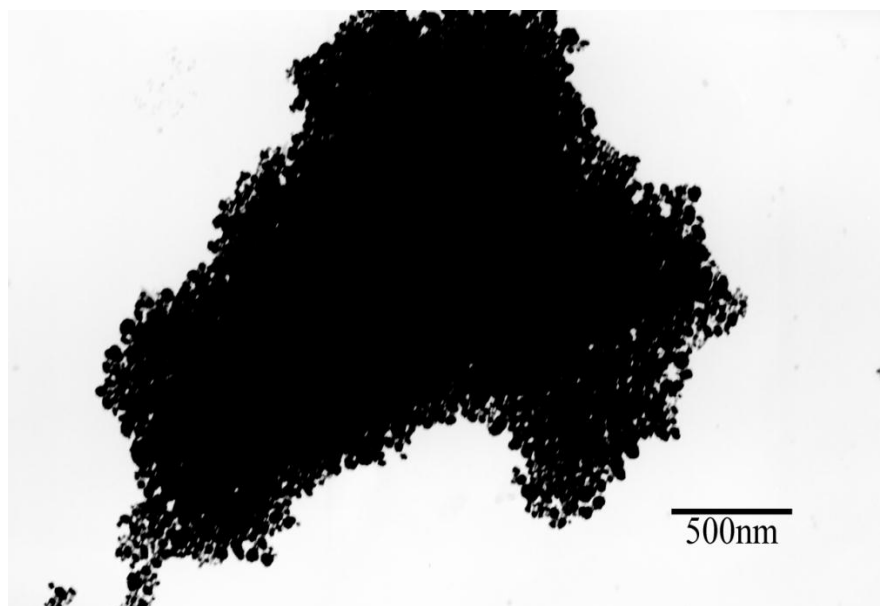

Fig. SI3. The illustration of the process involving PVP:

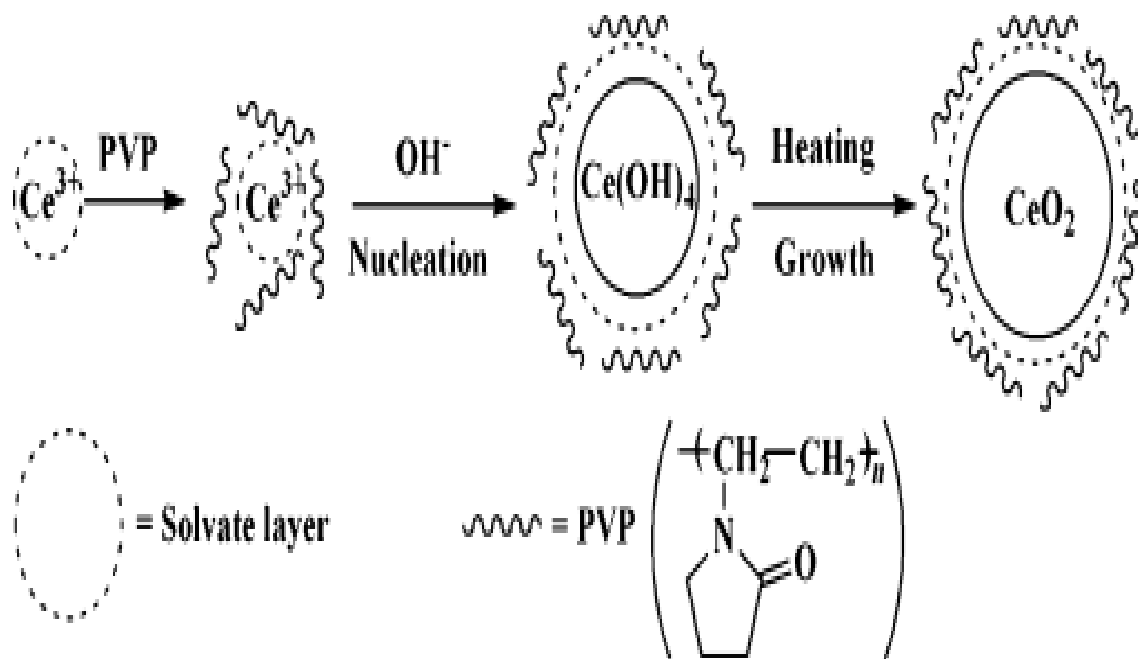

Supplement: c2ce26651b.pdf [file c2ce26651b.pdf]
